# Supplementary material
Source: publisher site journal article supplement (https://www.dovepress.com/article/523513)
Supplement: Supplementary file 1 [file 523513-Revised-Supplementary-Table.docx]

Supplement table 1. Characteristics and comparison of subjects with and without depressive symptoms in different group

|  |  | Health | | | MS | | | CAD | | | ACS | | | PCI | | | HF | | |
| --- | --- | --- | --- | --- | --- | --- | --- | --- | --- | --- | --- | --- | --- | --- | --- | --- | --- | --- | --- |
| Characteristics |  | normal | depression | p value | normal | depression | p value | normal | depression | p value | normal | depression | p value | normal | depression | p value | normal | depression | p value |
| age | ＜65 | 0.87 | 0.92 | 0.07 | 0.67 | 0.59 | 0.001＜P＜0.01 | 0.49 | 0.40 | P＜0.001 | 0.53 | 0.46 | 0.12 | 0.55 | 0.51 | 0.33 | 0.25 | 0.20 | 0.06 |
| ≥65 | 0.13 | 0.08 | 0.33 | 0.41 | 0.51 | 0.60 | 0.47 | 0.54 | 0.45 | 0.49 | 0.75 | 0.80 |
| Gender | Male | 0.36 | 0.29 | 0.06 | 0.58 | 0.41 | P＜0.001 | 0.61 | 0.46 | P＜0.001 | 0.57 | 0.55 | 0.66 | 0.73 | 0.67 | 0.13 | 0.57 | 0.50 | 0.01＜P＜0.05 |
| Female | 0.64 | 0.71 | 0.42 | 0.59 | 0.39 | 0.54 | 0.43 | 0.45 | 0.27 | 0.33 | 0.43 | 0.50 |
| Nation | Han | 0.97 | 0.92 | P＜0.001 | 0.95 | 0.98 | 0.05 | 0.95 | 0.92 | P＜0.001 | 0.95 | 0.92 | 0.06 | 0.97 | 0.93 | 0.01＜P＜0.05 | 0.94 | 0.83 | P＜0.001 |
| Minority | 0.03 | 0.08 | 0.05 | 0.02 | 0.05 | 0.08 | 0.05 | 0.08 | 0.03 | 0.07 | 0.06 | 0.17 |
| Religion | No | 0.95 | 0.89 | P＜0.001 | 0.94 | 0.94 | 0.92 | 0.93 | 0.91 | 0.01＜P＜0.05 | 0.91 | 0.95 | 0.05 | 0.95 | 0.94 | 0.40 | 0.93 | 0.82 | P＜0.001 |
| Yes | 0.05 | 0.11 | 0.06 | 0.06 | 0.07 | 0.09 | 0.09 | 0.05 | 0.05 | 0.06 | 0.07 | 0.18 |
| Marital status | Never married | 0.01 | 0.02 | 0.59 | 0.01 | 0.03 | 0.001＜P＜0.01 | 0.01 | 0.01 | P＜0.001 | 0.00 | 0.00 | 0.91 | 0.00 | 0.01 | 0.35 | 0.01 | 0.01 | 0.84 |
| Married | 0.96 | 0.95 | 0.93 | 0.90 | 0.93 | 0.88 | 0.93 | 0.92 | 0.95 | 0.93 | 0.85 | 0.84 |
| Divorced/widowed | 0.03 | 0.02 | 0.06 | 0.07 | 0.06 | 0.11 | 0.07 | 0.08 | 0.04 | 0.06 | 0.14 | 0.15 |
| Employ status | Umemployed | 0.17 | 0.18 | 0.96 | 0.11 | 0.16 | P＜0.001 | 0.19 | 0.21 | 0.01＜P＜0.05 | 0.28 | 0.21 | 0.01＜P＜0.05 | 0.26 | 0.29 | 0.06 | 0.25 | 0.25 | 0.001＜P＜0.01 |
| Retired | 0.23 | 0.23 | 0.50 | 0.57 | 0.64 | 0.65 | 0.51 | 0.62 | 0.50 | 0.55 | 0.66 | 0.71 |
| Employed | 0.60 | 0.59 | 0.39 | 0.27 | 0.17 | 0.14 | 0.22 | 0.17 | 0.24 | 0.15 | 0.10 | 0.05 |
| education | primary education or below | 0.12 | 0.17 | 0.01＜P＜0.05 | 0.13 | 0.20 | P＜0.001 | 0.20 | 0.25 | 0.001＜P＜0.01 | 0.26 | 0.23 | 0.45 | 0.31 | 0.32 | 0.32 | 0.33 | 0.36 | 0.60 |
| secondary school education | 0.44 | 0.47 | 0.52 | 0.54 | 0.59 | 0.57 | 0.53 | 0.58 | 0.54 | 0.58 | 0.53 | 0.50 |
| high education or above | 0.45 | 0.36 | 0.35 | 0.26 | 0.21 | 0.18 | 0.21 | 0.18 | 0.15 | 0.11 | 0.15 | 0.14 |
| Technical titles | none | 0.64 | 0.69 | 0.23 | 0.67 | 0.69 | P＜0.001 | 0.70 | 0.67 | 0.12 | 0.77 | 0.73 | 0.30 | 0.85 | 0.75 | 0.01＜P＜0.05 | 0.81 | 0.75 | 0.15 |
| Primary | 0.09 | 0.08 | 0.07 | 0.11 | 0.09 | 0.08 | 0.05 | 0.08 | 0.06 | 0.07 | 0.07 | 0.07 |
| Intermediate | 0.16 | 0.17 | 0.17 | 0.14 | 0.13 | 0.15 | 0.12 | 0.13 | 0.06 | 0.12 | 0.08 | 0.12 |
| Senior | 0.11 | 0.07 | 0.09 | 0.06 | 0.08 | 0.10 | 0.06 | 0.06 | 0.03 | 0.06 | 0.05 | 0.06 |
| Exercise regularly | No | 0.58 | 0.53 | 0.23 | 0.47 | 0.47 | 0.79 | 0.45 | 0.46 | 0.57 | 0.63 | 0.59 | 0.26 | 0.68 | 0.69 | 0.76 | 0.70 | 0.65 | 0.11 |
| Yes | 0.42 | 0.47 | 0.53 | 0.53 | 0.55 | 0.54 | 0.37 | 0.41 | 0.32 | 0.31 | 0.30 | 0.35 |
| Alcohol drinking | never | 0.85 | 0.84 | 0.95 | 0.66 | 0.76 | 0.001＜P＜0.01 | 0.74 | 0.80 | 0.01＜P＜0.05 | 0.79 | 0.81 | 0.23 | 0.70 | 0.68 | 0.07 | 0.81 | 0.83 | 0.01＜P＜0.05 |
| current drinking | 0.12 | 0.13 | 0.25 | 0.16 | 0.14 | 0.10 | 0.11 | 0.07 | 0.18 | 0.13 | 0.10 | 0.05 |
| once, has quit drinking | 0.02 | 0.02 | 0.08 | 0.09 | 0.13 | 0.10 | 0.10 | 0.11 | 0.12 | 0.18 | 0.10 | 0.12 |
| Smoking | never | 0.88 | 0.87 | 0.26 | 0.68 | 0.74 | 0.01＜P＜0.05 | 0.66 | 0.73 | 0.001＜P＜0.01 | 0.70 | 0.75 | 0.28 | 0.53 | 0.59 | 0.01＜P＜0.05 | 0.75 | 0.76 | 0.40 |
| current smoking | 0.09 | 0.11 | 0.21 | 0.14 | 0.13 | 0.12 | 0.16 | 0.12 | 0.28 | 0.17 | 0.10 | 0.07 |
| once, has quit smoking | 0.03 | 0.01 | 0.10 | 0.12 | 0.21 | 0.15 | 0.14 | 0.13 | 0.20 | 0.24 | 0.15 | 0.16 |
| BMI | BMI＜18.5 | 0.00 | 0.00 | 0.10 | 0.00 | 0.02 | P＜0.001 | 0.01 | 0.03 | 0.001＜P＜0.01 | 0.02 | 0.03 | 0.23 | 0.02 | 0.03 | 0.46 | 0.03 | 0.04 | 0.59 |
| 18.5≥BMI≥24.9 | 0.05 | 0.08 | 0.24 | 0.34 | 0.64 | 0.67 | 0.66 | 0.72 | 0.64 | 0.66 | 0.65 | 0.67 |
| BMI≥25 | 0.95 | 0.92 | 0.76 | 0.64 | 0.35 | 0.30 | 0.32 | 0.25 | 0.34 | 0.30 | 0.32 | 0.30 |
| Sleep disturbance | No | 0.91 | 0.68 | P＜0.001 | 0.85 | 0.52 | P＜0.001 | 0.79 | 0.47 | 0.001＜P＜0.01 | 0.83 | 0.57 | P＜0.001 | 0.87 | 0.63 | P＜0.001 | 0.83 | 0.42 | P＜0.001 |
| Yes | 0.09 | 0.32 | 0.15 | 0.48 | 0.21 | 0.53 | 0.17 | 0.43 | 0.13 | 0.37 | 0.17 | 0.58 |
